# Supplementary material for: Quality assessment of the commercially available alcohol-based hand sanitizers with femtosecond thermal lens spectroscopy
Source: PeerJ journal article supplement (doi:10.7717/peerj-achem.25), 2023-05-30
Supplement: Figure7RawData_79022_JT_staff.xlsx [file Figure7RawData_79022_JT_staff.xlsx]

## Sheet: Figure 7a
Water Volume Fraction (%)	S1-Water Mixture		S2-Water Mixture		S3-Water Mixture
	S(t)	TL(t) = 1-S(t)	S(t)	TL(t) = 1-S(t)	S(t)	TL(t) = 1-S(t)
0	0.105	0.895	0.099	0.901	0.127	0.873
10	0.135	0.865	0.106	0.894	0.13	0.87
20	0.165	0.835	0.117	0.883	0.131	0.869
30	0.192	0.808	0.125	0.875	0.161	0.839
40	0.189	0.811	0.144	0.856	0.204	0.796
50	0.309	0.691	0.197	0.803	0.502	0.498
60	0.513	0.487	0.317	0.683	0.546	0.454
70	0.681	0.319	0.607	0.393	0.714	0.286
80	0.856	0.144	0.731	0.269	0.83	0.17
90	0.89	0.11	0.885	0.115	0.879	0.121
100	0.905	0.095	0.905	0.095	0.905	0.095

## Sheet: Figure 7b
Water Volume Fraction (%)	IPA-Water Mixture		EtOH-Water Mixture
	S(t)	TL(t) = 1-S(t)	S(t)	TL(t) = 1-S(t)
0	0.114	0.886	0.197	0.803
10	0.108	0.892	0.163	0.837
20	0.0982	0.9018	0.127	0.873
30	0.09	0.91	0.105	0.895
40	0.0962	0.9038	0.143	0.857
50	0.149	0.851	0.176	0.824
60	0.233	0.767	0.278	0.722
70	0.388	0.612	0.538	0.462
80	0.759	0.241	0.765	0.235
90	0.869	0.131	0.875	0.125
100	0.905	0.095	0.905	0.095
